# Supplementary material for: Identification of research priorities for suicide prevention in Nepal: a Delphi study
Source: PubMed Central journal article supplement (PMC9233798; doi:10.1186/s12888-022-04074-z), 2022-06-25
Supplement: 12888_2022_4074_MOESM1_ESM.pdf [file 12888_2022_4074_MOESM1_ESM.pdf]

**Round 1: Questionnaire for Researchers/Practitioners/Advocates**

**Participant's Identification Number:**

| S. No.           | Questions                                                                  | Response                                                                                            |
|------------------|----------------------------------------------------------------------------|-----------------------------------------------------------------------------------------------------|
| <b>Section I</b> |                                                                            |                                                                                                     |
| 1.               | <b>Name</b>                                                                | .....                                                                                               |
| 2.               | <b>Age</b>                                                                 | .....                                                                                               |
| 3.               | <b>Gender</b>                                                              | a. Male<br>b. Female<br>c. Others (please specify) .....                                            |
| 4.               | <b>Permanent Address</b>                                                   | Province: ..... District: ..... City: .....                                                         |
| 5.               | <b>Temporary Address (leave blank if not relevant)</b>                     | Province: ..... District: ..... City: .....                                                         |
| 6.               | <b>Profession</b>                                                          | a. Researcher<br>b. Clinician<br>c. Advocates<br>d. Academician<br>e. Others (please specify) ..... |
| 7.               | <b>How long have you been involved in the field of suicide prevention?</b> | ..... years<br>..... months                                                                         |
| 8.               | <b>Name of current Institutions/Organizations</b>                          | .....                                                                                               |

**Section 2**

|                   |                                                                                                                                                                    |  |
|-------------------|--------------------------------------------------------------------------------------------------------------------------------------------------------------------|--|
| <p><b>9.</b></p>  | <p><b>In your view, what is the status, causes/risk factors of suicide and self-harm in Nepal?</b></p>                                                             |  |
| <p><b>10.</b></p> | <p><b>What is working well for suicide prevention in Nepal? (Aspects of health care delivery services, awareness, government plan and programs, community)</b></p> |  |

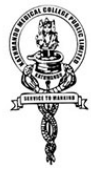

|                   |                                                                                                                                                                                                                                                       |  |
|-------------------|-------------------------------------------------------------------------------------------------------------------------------------------------------------------------------------------------------------------------------------------------------|--|
| <p><b>11.</b></p> | <p><b>What is not working well/challenges do you face while conducting your research/ practice with people who attempt to commit suicide?<br/>((Aspects of health care delivery services, awareness, government plan and programs, community)</b></p> |  |
| <p><b>12.</b></p> | <p><b>What additional information/ evidence would help your research or you work supporting people considering taking their life?</b></p>                                                                                                             |  |



|                   |                                                                                                                                                                          |                                                                                                                |
|-------------------|--------------------------------------------------------------------------------------------------------------------------------------------------------------------------|----------------------------------------------------------------------------------------------------------------|
| <p><b>13.</b></p> | <p><b>Can you provide 5-10 research questions that you think would improve the evidence to prevent suicide and attempted suicide in Nepal over the next 5 years.</b></p> | <p>i.</p> <p>ii.</p> <p>iii.</p> <p>iv.</p> <p>v.</p> <p>vi.</p> <p>vii.</p> <p>viii.</p> <p>ix.</p> <p>x.</p> |
|-------------------|--------------------------------------------------------------------------------------------------------------------------------------------------------------------------|----------------------------------------------------------------------------------------------------------------|

| Section 3  |                                                                                                                      |                                                                             |
|------------|----------------------------------------------------------------------------------------------------------------------|-----------------------------------------------------------------------------|
| <b>12.</b> | <b>Can you let us know about any other organization or people who could be potential participants for our study?</b> | a. Yes (if yes please go to Q.No.13)<br>b. No (if no please go to Q.no. 14) |
| <b>13.</b> | <b>Please provide us with details</b>                                                                                | Name:<br>Professional Title:<br>Organization<br>Contact Details             |
|            |                                                                                                                      | Name:<br>Professional Title:<br>Organization<br>Contact Details             |
|            |                                                                                                                      | Name:<br>Professional Title:<br>Organization<br>Contact Details             |
| <b>14.</b> | <b>Would you be interested to be a part of Suicide Prevention Advisory Group in future?</b>                          | <b>Yes</b><br><b>No</b>                                                     |

**Thank you!**

**Round 1: Questionnaire for patients, care givers and family member participants.**

**Participant's Identification Number:**

| S. No.           | Questions                                                                              | Response                                                                          |
|------------------|----------------------------------------------------------------------------------------|-----------------------------------------------------------------------------------|
| <b>Section 1</b> |                                                                                        |                                                                                   |
| 1.               | Name                                                                                   | .....                                                                             |
| 2.               | Age                                                                                    | .....                                                                             |
| 3.               | Gender                                                                                 | a. Male<br>b. Female<br>c. Others (Please specify)....                            |
| 4.               | Are you someone who has previously attempted to harm themselves?                       | a. Yes<br>b. No<br>If Yes, how long has it been?.....years.....months             |
| 5.               | If No, please tell us your relationship with the person who tried to harm themselves?  | a. Caregiver<br>b. Family member<br>c. Friend<br>d. Others (Please specify) ..... |
| 6.               | What is your Permanent Address                                                         | Province: ..... District: ..... City: .....                                       |
| 7.               | What is your Temporary Address (leave blank if not relevant)                           | Province: ..... District: ..... City: .....                                       |
| <b>Section 2</b> |                                                                                        |                                                                                   |
| 8.               | What do you think are the most important things that researchers or doctors and nurses |                                                                                   |

|            |                                                                                                              |  |
|------------|--------------------------------------------------------------------------------------------------------------|--|
|            | <b>should study or do in order to help people who are thinking of harming themselves?</b>                    |  |
| <b>9.</b>  | <b>At individual/family level, how do you think we can reduce or prevent people from harming themselves?</b> |  |
| <b>10.</b> | <b>At community level, how do you think we can reduce or prevent people from harming themselves?</b>         |  |

|     |                                                                                              |  |
|-----|----------------------------------------------------------------------------------------------|--|
|     |                                                                                              |  |
| 11. | At national level, how do you think we can reduce or prevent people from harming themselves? |  |

Thank you!
